# Supplementary material for: Fabrication of Gd2O(CO3)2·H2O/silica/gold hybrid particles as a bifunctional agent for MR imaging and photothermal destruction of cancer cells
Source: Royal Society of Chemistry journal article supplement (doi:10.1039/b815087g), 2009-01-01
Supplement: b815087g.pdf [file b815087g.pdf]

## Fabrication of $\text{Gd}_2\text{O}(\text{CO}_3)_2 \cdot \text{H}_2\text{O}$ /silica/gold hybrid particles as a bifunctional agent for MR imaging and photothermal destruction of cancer cells

Kuo-Wei Hu,<sup>a</sup> Fang-Yu Jhang,<sup>a</sup> Chia-Hao Su,<sup>a,b,c</sup> and Chen-Sheng Yeh\*<sup>a</sup>

<sup>a</sup>Department of Chemistry, National Cheng Kung University, Tainan 701, Taiwan

<sup>b</sup>Interdisciplinary MRI/MRS Lab, Department of Electrical Engineering, National Taiwan University, Taipei 10617, Taiwan

<sup>c</sup>National Taiwan University Research Center for Medical Excellence, College of Medicine, National Taiwan University, Taipei 100, Taiwan

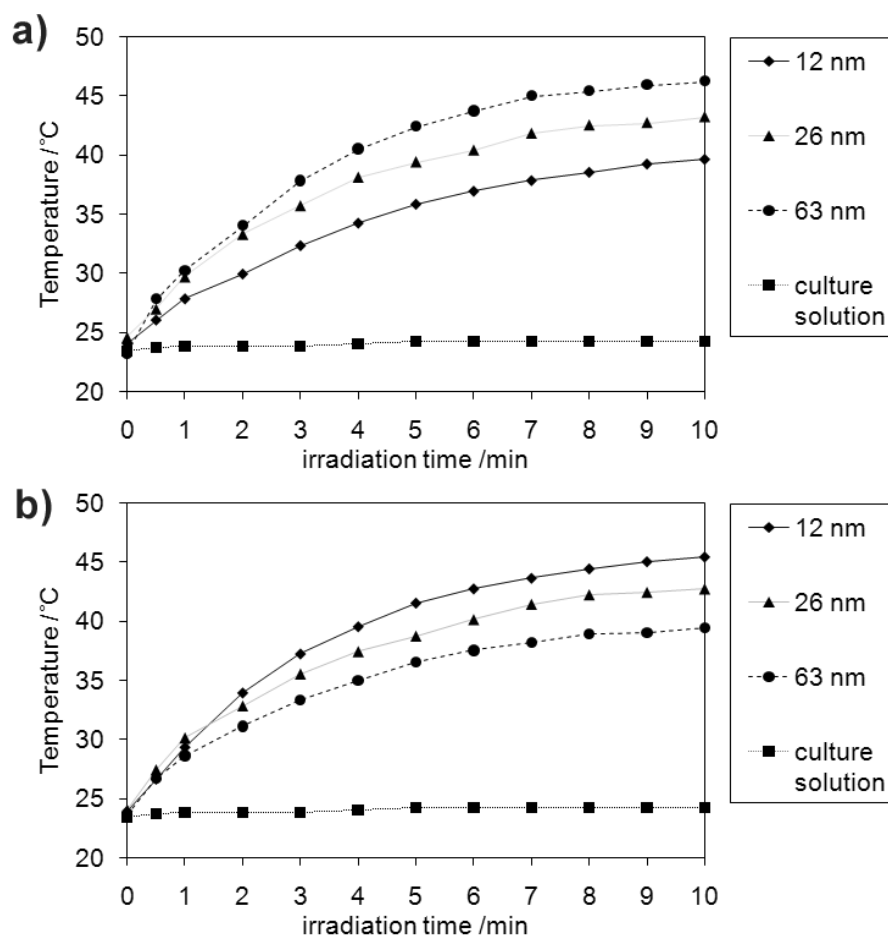

**Figure S1** The temperature elevation profiles of hybrid particles with 12, 26, 63 nm Au shell irradiated by a CW laser power of 25 W cm<sup>-2</sup> under the concentration of (a)  $7 \times 10^7$  particles mL<sup>-1</sup> and (b)  $200 \mu\text{g mL}^{-1}$  in 0.2 mL culture solution (DMEM). The control experiments were conducted for the culture solution (DMEM) only in the absence of hybrid particles.
